# Supplementary material for: Prognostic Value of Systemic Immune-Inflammation Index (SII) in Patients with Glioblastoma: A Comprehensive Study Based on Meta-Analysis and Retrospective Single-Center Analysis
Source: MDPI journal article supplement (doi:10.3390/jcm11247514), 2022-12-19
Supplement: s1 [file s1]

**Supplementary Table S1.** Characteristics of the included prognostic studies

| Author<br>(Year)          | Countr<br>y | N   | Age          | Grad<br>e | Sampling<br>time | Cutoff<br>value(10e<br>9/L) | UVA/MVA |
|---------------------------|-------------|-----|--------------|-----------|------------------|-----------------------------|---------|
| Lv<br>(2019)              | China       | 192 | /            | GBM       | Preoperative     | 718                         | UVA     |
| Topkan<br>(2020)          | Turkey      | 167 | Median<br>57 | GBM       | Postoperative    | 565                         | MVA     |
| Yılmaz<br>(2021)          | Turkey      | 120 | /            | GBM       | Postoperative    | 1111                        | MVA     |
| Shi(202<br>2)             | China       | 232 | /            | GBM       | Preoperative     | 659.1                       | MVA     |
| Pasqual<br>etti(202<br>2) | Italy       | 77  | Median<br>64 | GBM       | Preoperative     | 1200                        | UVA     |

N(F/M): numbers of patients(female/male); HGG: high grade glioma; GBM: glioblastoma; UVA: univariate analysis; MVA: multivariate analysis

**Supplementary Table S2.** Quality evaluation of included studies using the Newcastle Ottawa Scale for cohort studies

| Author          | Year | Selections |   |   |   | Comparability | Outcome |   |   | Scores |
|-----------------|------|------------|---|---|---|---------------|---------|---|---|--------|
|                 |      | A          | B | C | D |               | F       | G | H |        |
| Lv              | 2019 | 1          | 1 | 1 | 0 | 1             | 1       | 1 | 1 | 7      |
| Topkan          | 2020 | 1          | 1 | 1 | 0 | 1             | 1       | 1 | 1 | 7      |
| Yilmaz          | 2021 | 1          | 1 | 1 | 0 | 1             | 1       | 1 | 1 | 7      |
| Shi             | 2022 | 1          | 1 | 1 | 0 | 1             | 1       | 1 | 1 | 7      |
| Pasqual<br>etti | 2022 | 1          | 1 | 1 | 0 | 1             | 1       | 1 | 1 | 7      |

A: Representativeness of the exposed cohort: Highly representative or partially representative (one point); no description (no point), B: Selection of the non-exposed cohort: Patients drawn from the same community as the exposed cohort (one point); patients drawn from a different source or no description (no point), C: Ascertainment of exposure: Information obtained from secure record or structured interview (one point); written self-report or no description (no point), D: Demonstration that outcome of interest was not present at start of study: yes (one point), no (no point), E: Comparability of cohorts based on the design or analysis: Study controls for important factor, such as age, ECOG, molecular markers, extent of resection, (two points: All factors were included, one point: Part of them were included), F: Assessment of outcome: Independent blind assessment or record linkage (one point); self-report or no description (no point), G: Follow-up long enough for outcomes to occur: Yes (one point); no (no point), H: Adequacy of follow-up of cohorts: Complete follow up-all subjects accounted for or subjects lost to follow up unlikely to introduce bias (one point); no statement (no point).

Supplementary Table S3. Subgroup analysis of OS

|                 |                 |               | Random-effects model |          | Fixed-effects model |          | Heterogeneity      |       |
|-----------------|-----------------|---------------|----------------------|----------|---------------------|----------|--------------------|-------|
| Analysis        |                 | N Ref.        | HR (95% CI)          | <i>p</i> | HR(95% CI)          | <i>p</i> | I <sup>2</sup> (%) | Ph    |
| <b>Subgroup</b> |                 |               |                      |          |                     |          |                    |       |
| <b>1</b>        | Preoperative    | 3 21,22,26    |                      |          | 1.81(1.43-2.29)     | <0.001   | 0                  | 0.431 |
|                 | Postoperative   | 2 20,23       | 1.92(0.79-4.67)      | 0.15     | /                   | /        | 57.0               | 0.127 |
|                 |                 |               |                      | 0        |                     |          |                    |       |
| <b>Subgroup</b> |                 |               |                      |          |                     |          |                    |       |
| <b>2</b>        | Sample size>100 | 4 20,21,23,26 | /                    | /        | 1.87(1.48-2.36)     | <0.001   | 32                 | 0.220 |
|                 | Sample size≤100 | 1 22          | 1.85(1.06-3.23)      | 0.02     | /                   | /        | /                  | /     |
|                 |                 |               |                      | 0        |                     |          |                    |       |
| <b>Subgroup</b> |                 |               |                      |          |                     |          |                    |       |
| <b>3</b>        | MVA             | 3 20,21,23    | /                    | /        | 2.21(1.60-3.07)     | <0.001   | 14.3               | 0.311 |
|                 | UVA             | 2 22,26       | /                    | /        | 1.64(1.23-2.18)     | 0.001    | 0                  | 0.624 |
|                 |                 |               |                      |          |                     |          |                    |       |

N: number of studies; HR: hazard ratio; 95% CI: 95% confidence interval; Ph: p values of Q test for heterogeneity test; UVA: univariate analysis; MVA: multivariate analysis
