# Supplementary material for: Prognostic Value of Systemic Immune-Inflammation Index (SII) in Patients with Glioblastoma: A Comprehensive Study Based on Meta-Analysis and Retrospective Single-Center Analysis
Source: MDPI journal article supplement (doi:10.3390/jcm11247514), 2022-12-19
Supplement: s1 [file s1]

### **Statistical analysis for meta-analysis**

The OS was analyzed by the HR. Forest plots were drawn to obtain the pooled HR, which was considered statistically significant if the 95% CI did not overlap 1 and the p value was less than 0.05. Subgroup analyzes were performed based on number of patients, sampling time and type of analysis to explore the sources of potential heterogeneity. Cochran's Q test and Higgins I-squared statistic were undertaken to assess the heterogeneity of the included studies and a P heterogeneity < 0.10 or  $I^2 > 50\%$  was considered as significant heterogeneity and random- or fixed-effect models were used when the heterogeneity was or was not significant. Sensitivity analysis was performed by excluding a single study at a time to examine the robustness of the results. Publication bias was evaluated by the Begg's and Egger's tests. All statistical processes of meta-analysis were performed using STATA statistical software (version 16.0; College Station, TX, USA).
