# Supplementary material for: Prognostic Value of Systemic Immune-Inflammation Index (SII) in Patients with Glioblastoma: A Comprehensive Study Based on Meta-Analysis and Retrospective Single-Center Analysis
Source: MDPI journal article supplement (doi:10.3390/jcm11247514), 2022-12-19
Supplement: s1 [file s1]

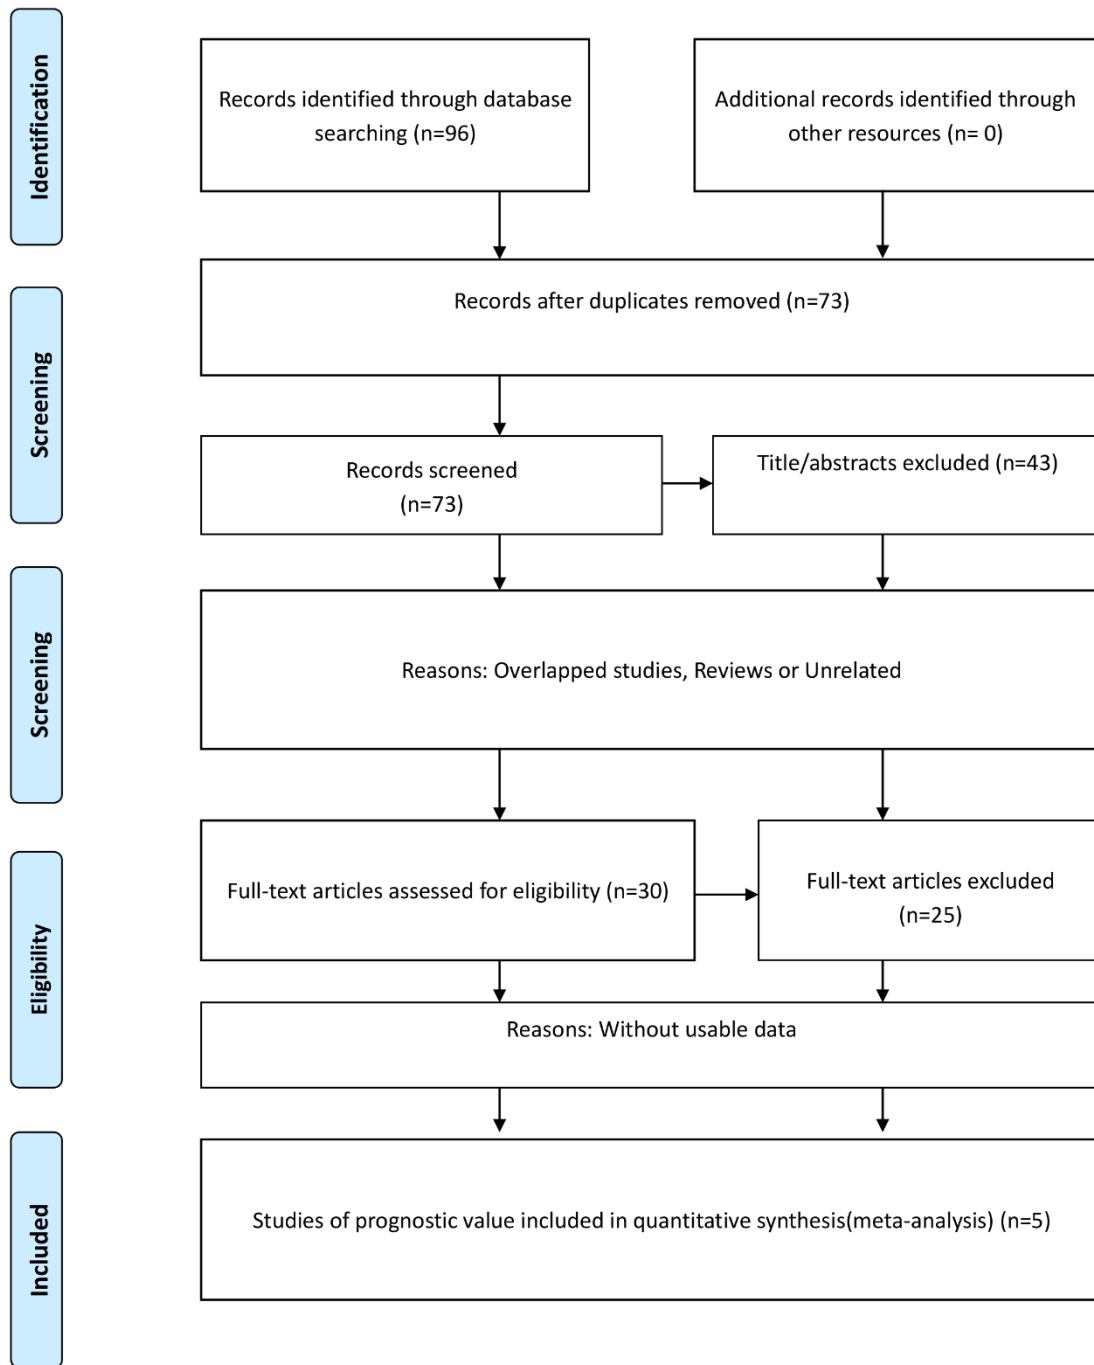

**Supplementary Figure S1.** Flow diagram of the study selection process during the meta-analysis

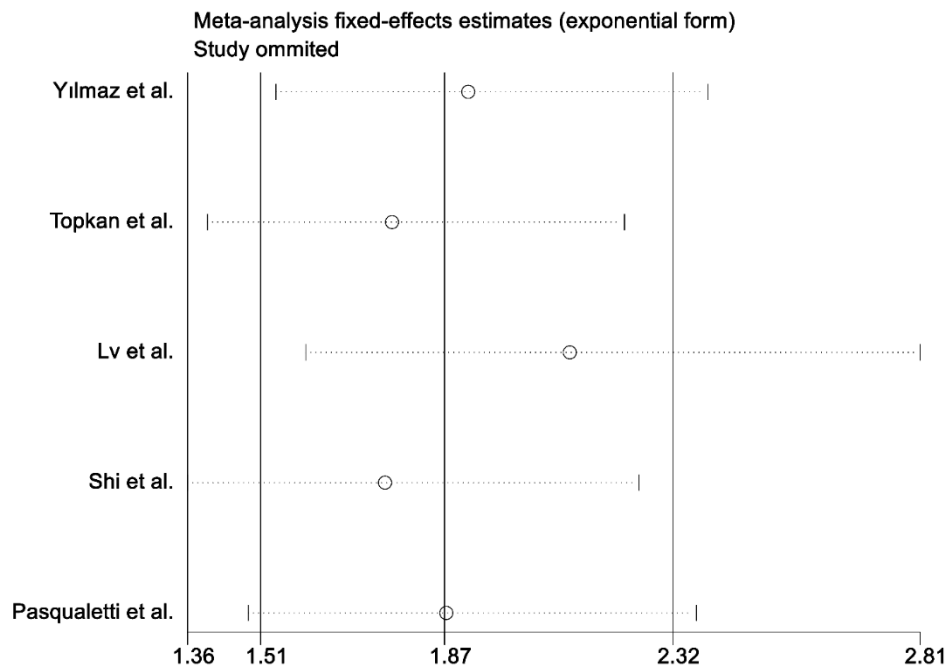

**Supplementary Figure S2.** Sensitive analysis of the relationship between SII and OS

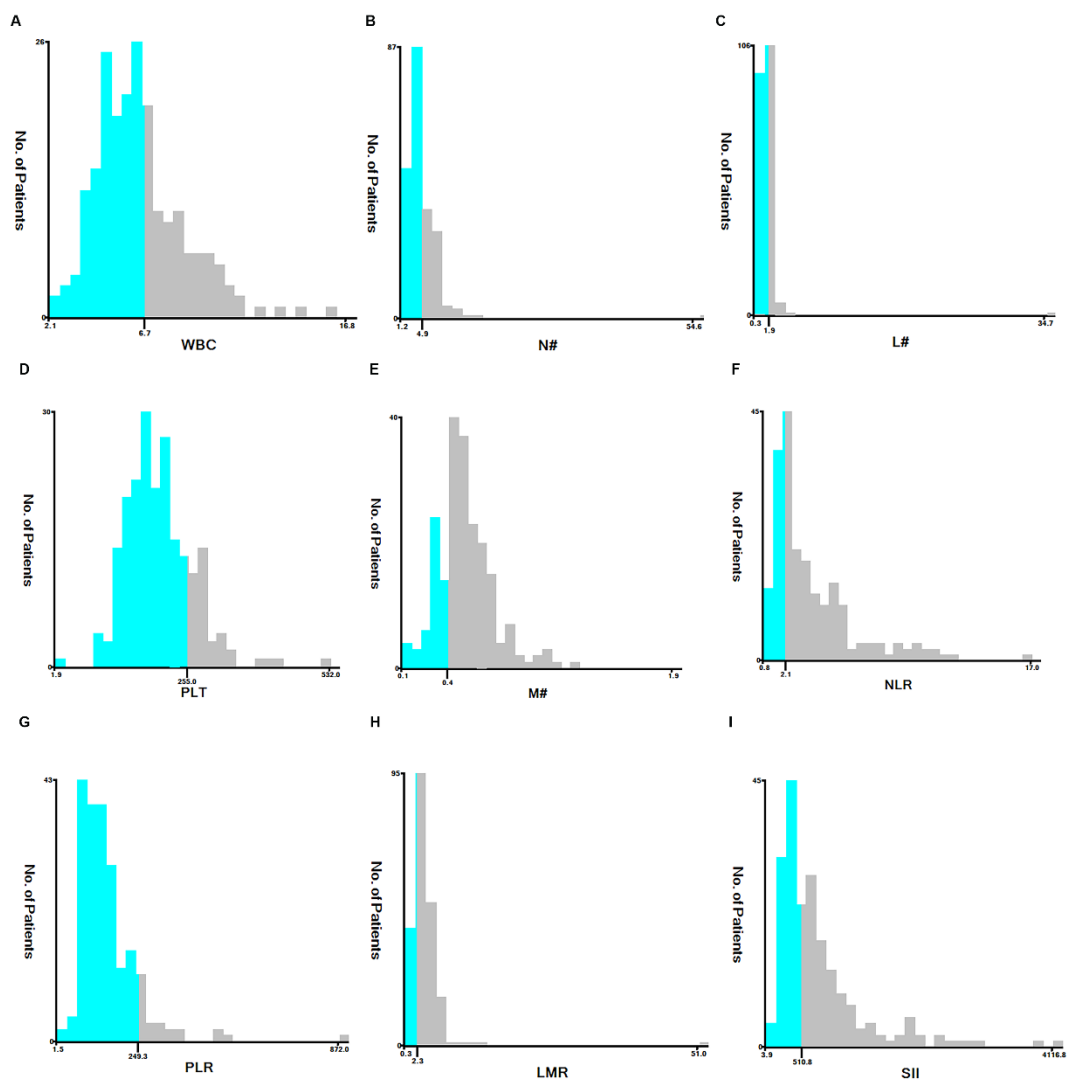

**Supplementary Figure S3.** Cut-off value of WBC (A), neutrophil (B), lymphocyte (C), platelet (D), monocyte (E), NLR (F), PLR (G), LMR (H) and SII (I) in patients with GBM

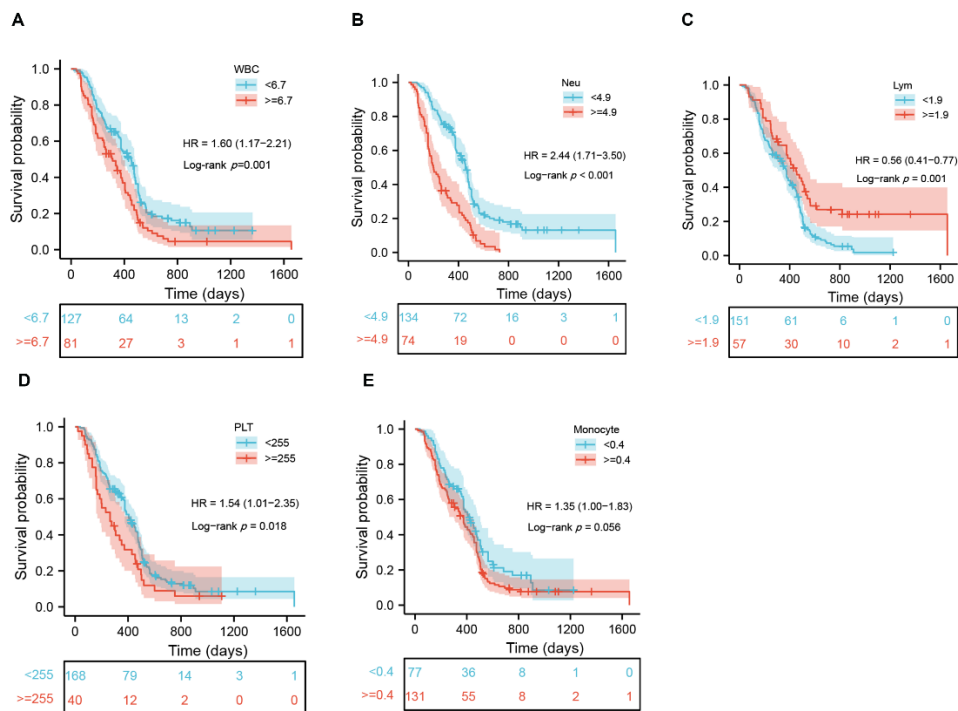

**Supplementary Figure S4.** Kaplan-Meier survival curves of glioblastoma patients based on the cutoff values of WBC (A), neutrophil (B), lymphocyte (C), platelet (D) and monocyte (E)

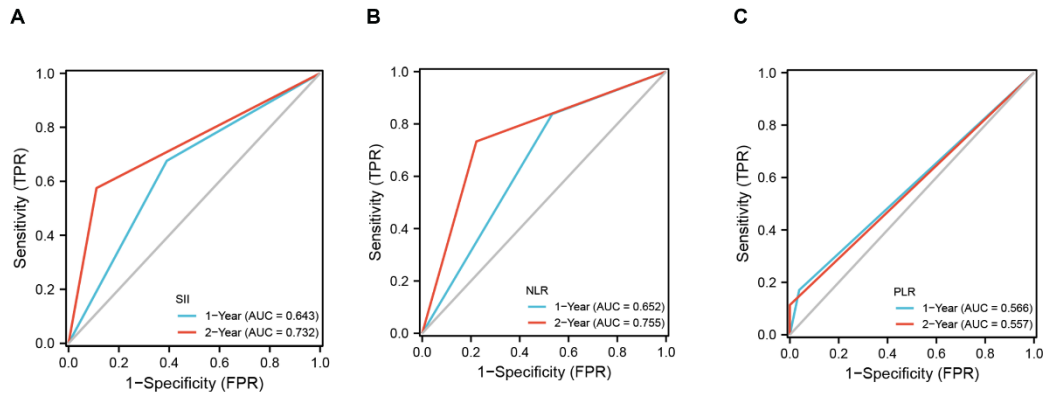

**Supplementary Figure S5.** Time-dependent ROC curve analysis of SII (A), NLR (B) and PLR (C) for predicting OS at one-year and two-year survival rate in patients with GBM

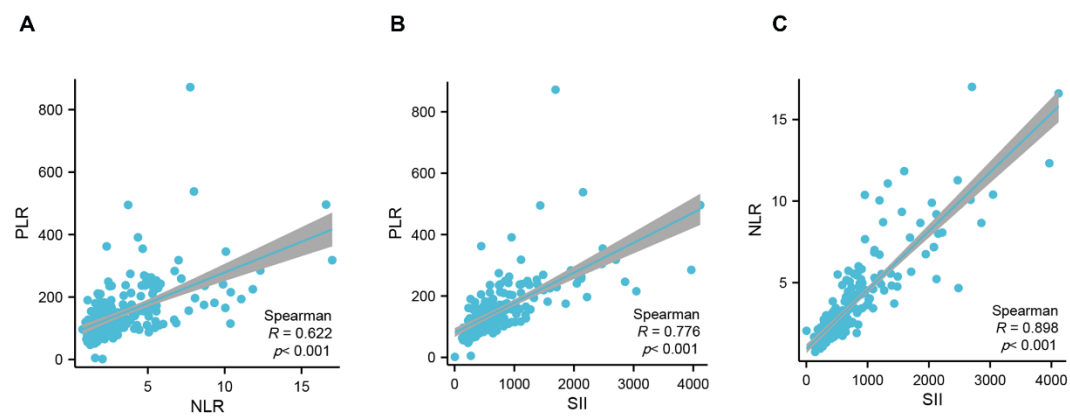

**Supplementary Figure S6.** Correlation analysis of SII, NLR and PLR.
