# Supplementary material for: Prognostic Value of Systemic Immune-Inflammation Index (SII) in Patients with Glioblastoma: A Comprehensive Study Based on Meta-Analysis and Retrospective Single-Center Analysis
Source: MDPI journal article supplement (doi:10.3390/jcm11247514), 2022-12-19
Supplement: s1 [file s1]

**Free terms:** (1) “Glioblastomas”; “Astrocytoma, Grade IV”; “Astrocytomas, Grade IV”; “Grade IV Astrocytoma”; “Grade IV Astrocytomas”; “Glioblastoma Multiforme”; “Giant Cell Glioblastoma”; “Giant Cell Glioblastomas”; “Glioblastoma, Giant Cell”; “Glioblastomas, Giant Cell”.

(2) “SII”.
