# Supplementary material for: Prognostic Value of Systemic Immune-Inflammation Index (SII) in Patients with Glioblastoma: A Comprehensive Study Based on Meta-Analysis and Retrospective Single-Center Analysis
Source: J Clin Med. 2022 Dec 19;11(24):7514. doi: 10.3390/jcm11247514 (PMC9787672; doi:10.3390/jcm11247514)
Supplement: Supplementary file 1 [file jcm-11-07514-s001.zip › Supplementary File S5.xlsx]

## Sheet: 1-Year
SII-NLR score
cut_value	sensitivities	specificities
#NUM!	1	0
0	0.837741	0.447619
1	0.67578	0.628571
2	0	1
SII-PLR score
cut_value	sensitivities	specificities
#NUM!	1	0
0	0.686439	0.609524
1	0.159879	0.961905
2	0	1
NLR-PLR score
cut_value	sensitivities	specificities
#NUM!	1	0
0	0.837741	0.466667
1	0.170538	0.961905
2	0	1

## Sheet: 2-Year
SII-NLR score
cut_value	sensitivities	specificities
#NUM!	1	0
0	0.739272	0.722222
1	0.568607	0.944444
2	0	1
SII-PLR score
cut_value	sensitivities	specificities
#NUM!	1	0
0	0.580345	0.888889
1	0.108253	1
2	0	1
NLR-PLR score
cut_value	sensitivities	specificities
#NUM!	1	0
0	0.733009	0.777778
1	0.113728	1
2	0	1
